# Supplementary material for: Droplet generation via a single bubble transformation in a nanofluidic channel
Source: Royal Society of Chemistry journal article supplement (doi:10.1039/c4lc01184h), 2015-01-01
Supplement: c4lc01184h1.pdf [file c4lc01184h1.pdf]

## Electronic Supplementary Information

### Droplets generation via a single bubble transformation in a nanofluidic channel

S. Xiong<sup>1</sup>, L. K. Chin<sup>1</sup>, K. Ando<sup>1,#</sup>, T. Tandonio<sup>2</sup>, A. Q. Liu<sup>1</sup> and C. D. Ohl<sup>3</sup>

<sup>1</sup>School of Electrical & Electronic Engineering, Nanyang Technological University,  
Singapore 639798

<sup>2</sup>Institute of High Performance Computing, A\*START, Singapore 138632

<sup>3</sup>School of Physical & Mathematical Sciences, Nanyang Technological University,  
Singapore 637371

([xiongsha@ntu.edu.sg](mailto:xiongsha@ntu.edu.sg))

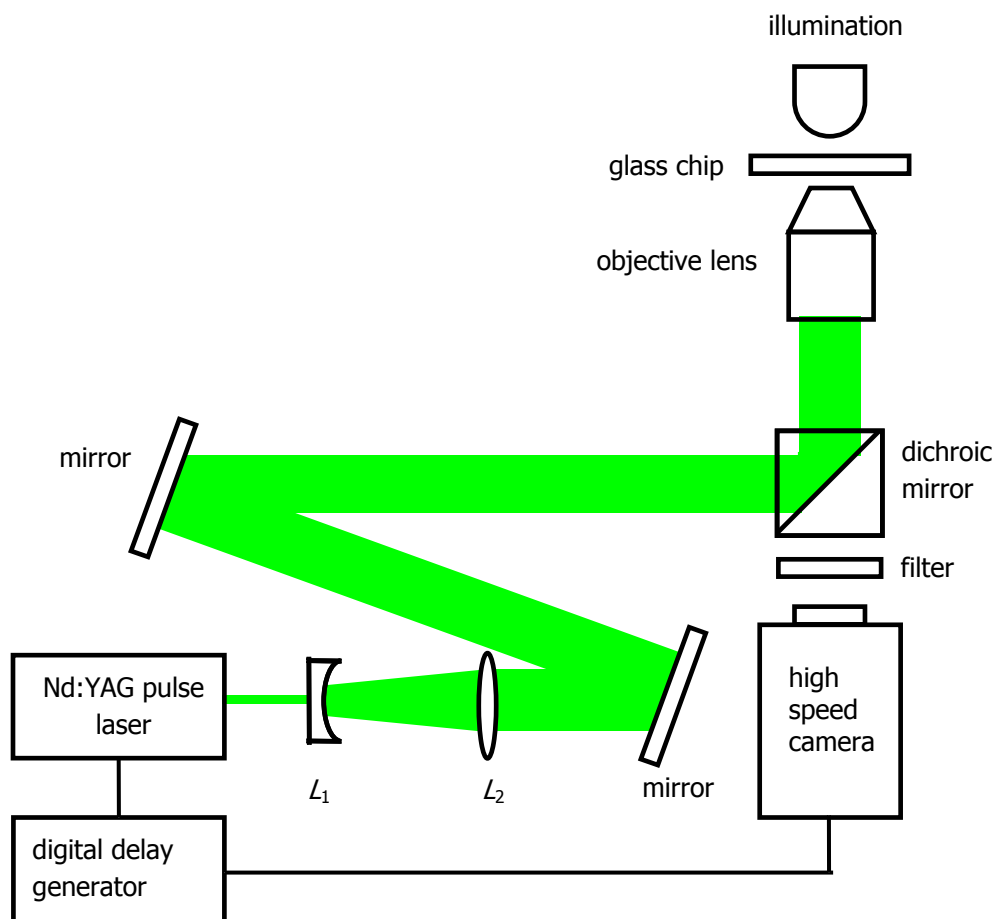

**Fig. S1:** Schematics of the experimental setup for laser-induced bubbles.
